# Supplementary material for: Cropland expansion drives vegetation greenness decline in Southeast Asia
Source: Copernicus journal article supplement (doi:10.5194/bg-21-5393-2024), 2024-12-05
Supplement: Supplementary file 1 [file bg-21-5393-2024-supplement.pdf]

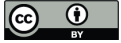

*Supplement of*

## **Cropland expansion drives vegetation greenness decline in Southeast Asia**

**Ruiying Zhao et al.**

*Correspondence to:* Ruiying Zhao ([ruiying@nus.edu.sg](mailto:ruiying@nus.edu.sg)) and Xiangzhong Luo ([xzluo.remi@nus.edu.sg](mailto:xzluo.remi@nus.edu.sg))

The copyright of individual parts of the supplement might differ from the article licence.

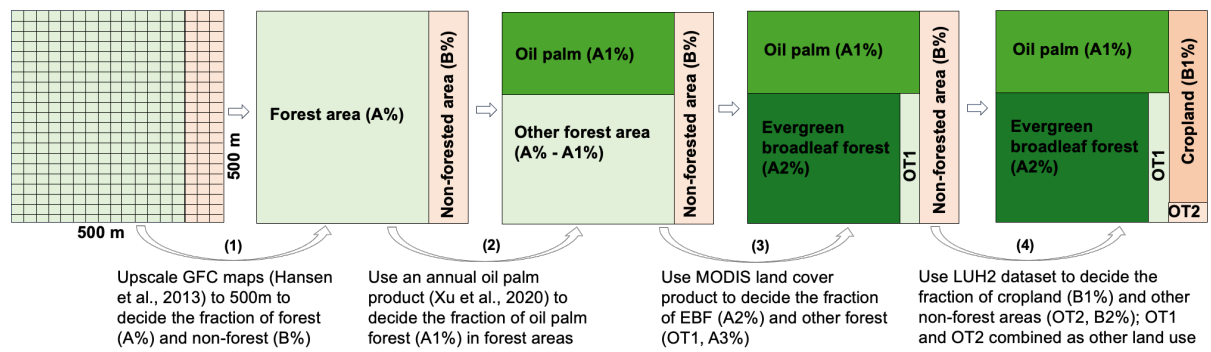

17

18

19

20

21

22

23

24

25

**Figure. S1: A conceptual diagram illustrating the harmonization of land cover datasets within a 500-meter grid for this study. Step (1) involves upscaling fine-resolution Global Forest Change (GFC) maps to 500 meters to classify forest (A%) and non-forest (B%) areas. Steps (2) and (3) calculate the proportions of oil palm, evergreen broadleaf forest (EBF), and other forest types (OT1) within the forested areas. Oil palm percentages are derived from a 100-meter resolution product, upscaled to 500 meters, while EBF and OT1 are sourced from the MODIS dataset. Step (4) calculates cropland and other land uses (OT2) using the LUH2 dataset, with the assumption that LUH2 data at a 0.25° resolution applies to the 500-meter grid cells within each 0.25° grid. The conceptual figure illustrates only the fraction of each land use, not their specific locations.**

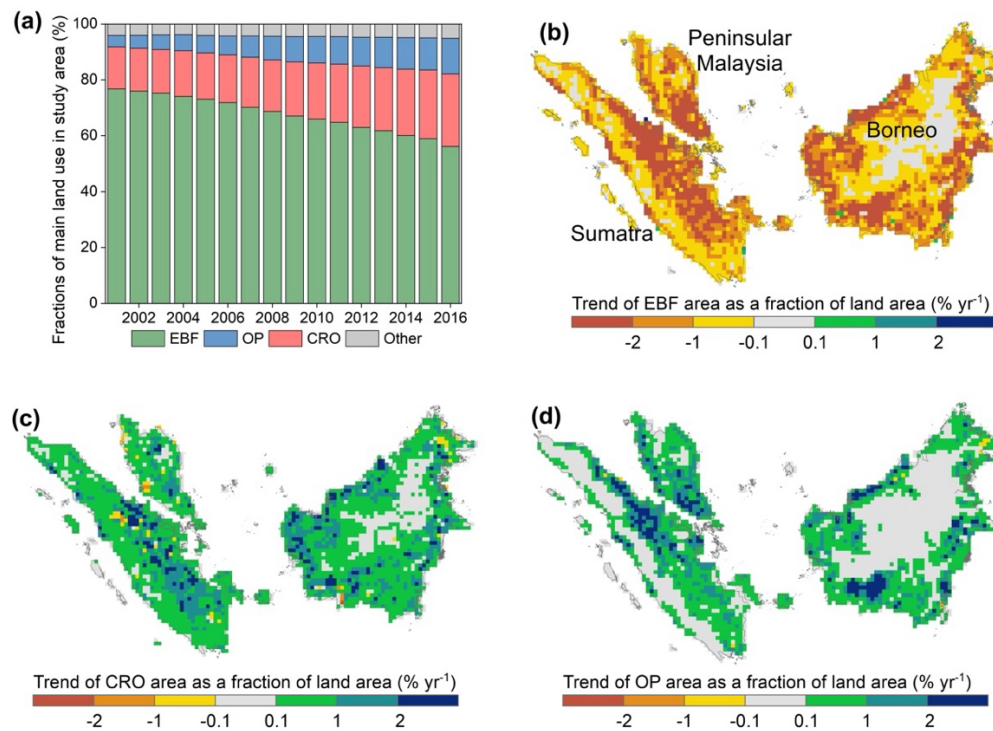

26

27

28

**Figure S2: Land use composition and its changes from 2001 to 2016 in the study area, analyzed at a 0.25-degree resolution.**

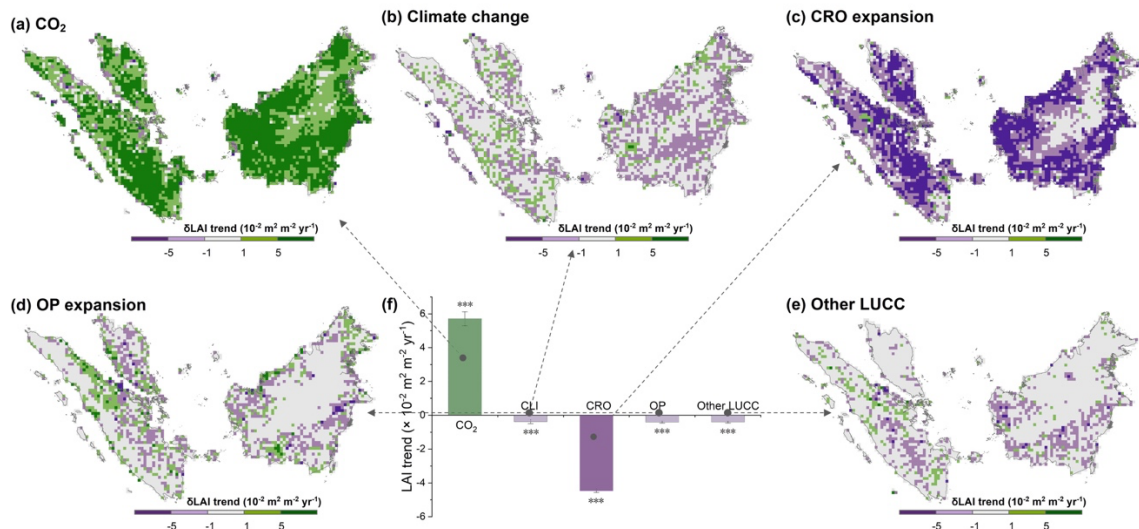

29  
 30 **Figure S3: The spatial distribution of the pixel-wise impacts of each process on the greening trends, analysed**  
 31 **at a 0.25-degree resolution.**

32  
 33

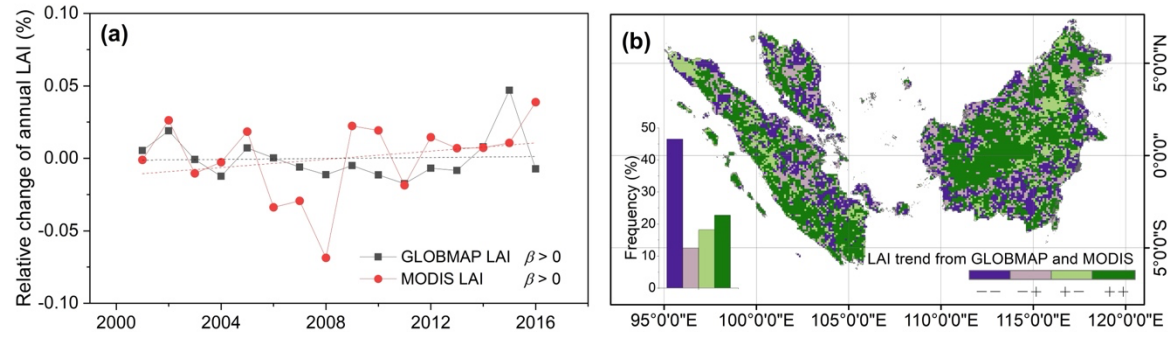

34  
 35 **Figure S4: Comparison of LAI Trends Between MODIS and GLOBEMAP LAI Datasets. (a) illustrates the**  
 36 **relative changes in annual mean LAI across the entire region from 2001 to 2016. (b) provides a spatial**  
 37 **comparison of the datasets, where '++' denotes an increasing trend observed in both datasets, '--' indicates**  
 38 **a decreasing trend in both, '+-' signifies an increasing trend in GLOBEMAP but a decrease in MODIS, and**  
 39 **'-+' represents the opposite scenario.**

40

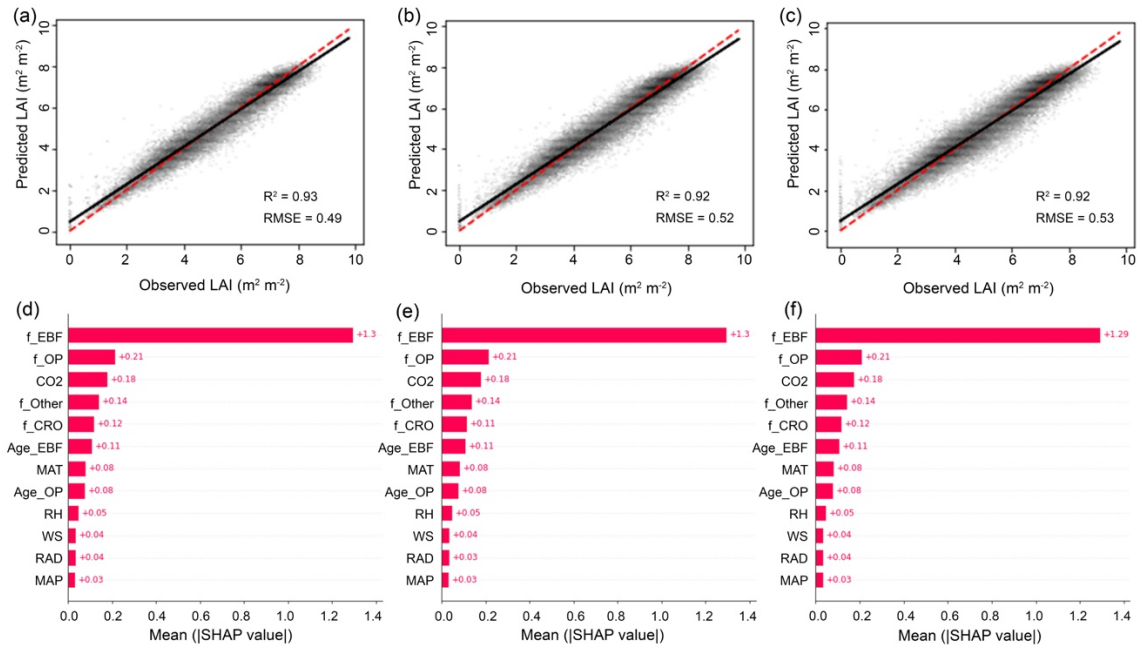

41

42 **Figure S5: The impact of different training and testing dataset splitting ratios on model performance and**

43 **interpretations. Panels (a) and (d) depict results using an 80%:20% ratio for training and testing, respectively.**

44 **Panels (b) and (e) correspond to a 70%:30% ratio, while panels (c) and (f) reflect a 60%:40% ratio.**

45

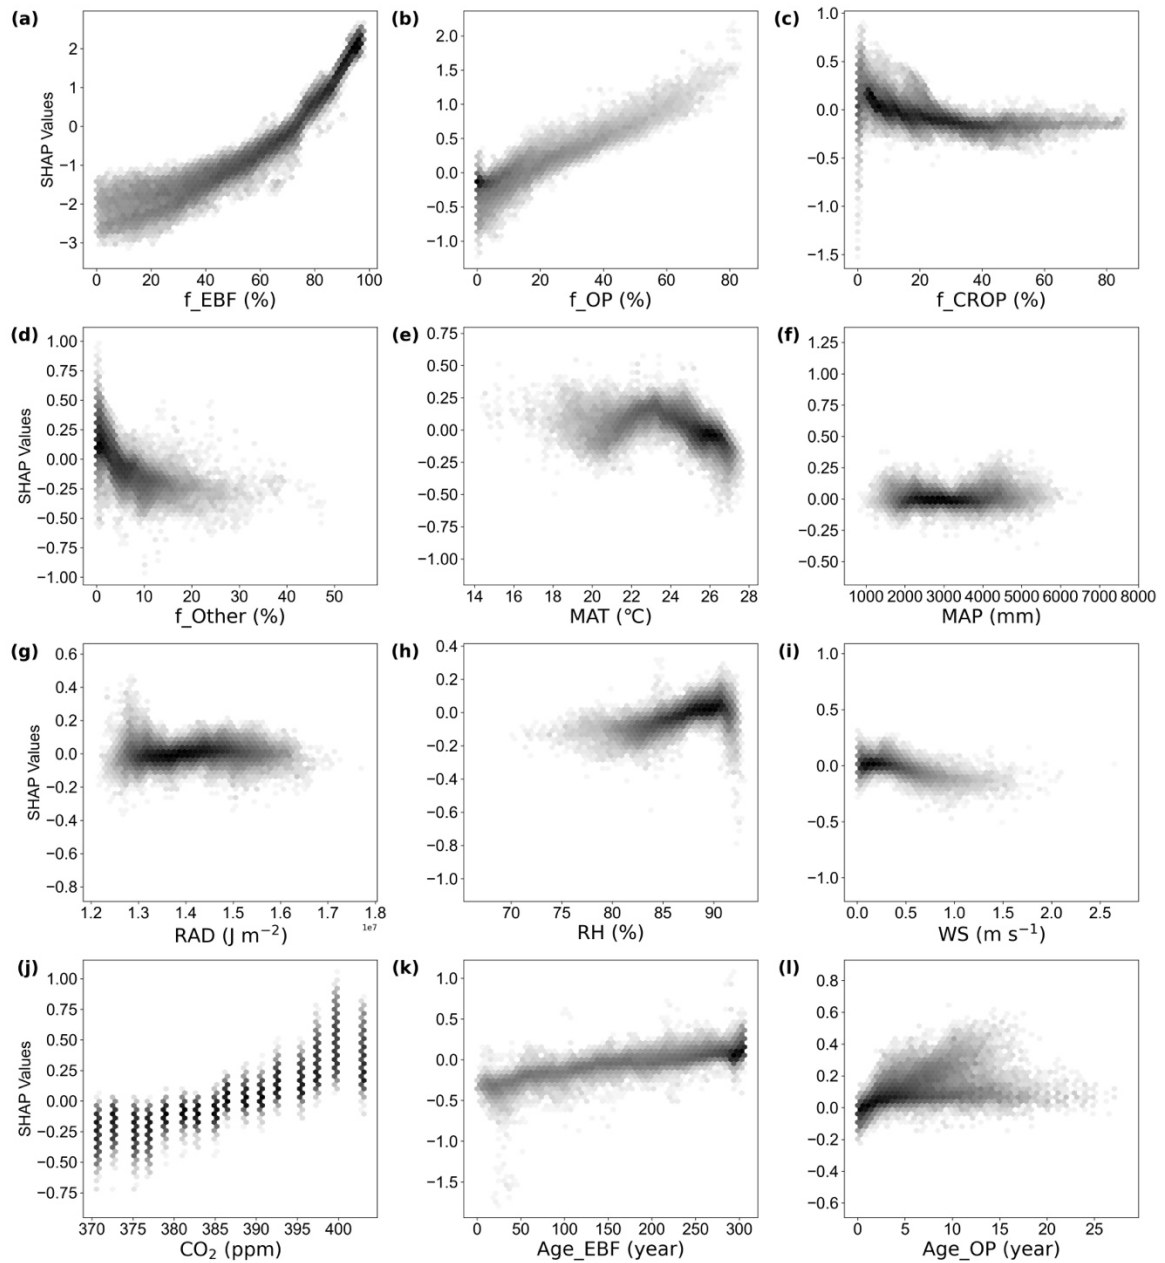

46

47 **Figure S6: The density plots show the changes in SHAP values of each factor on LAI with corresponding**

48 **factor variations. The abbreviations for each factor are available in Table S3.**

49

50

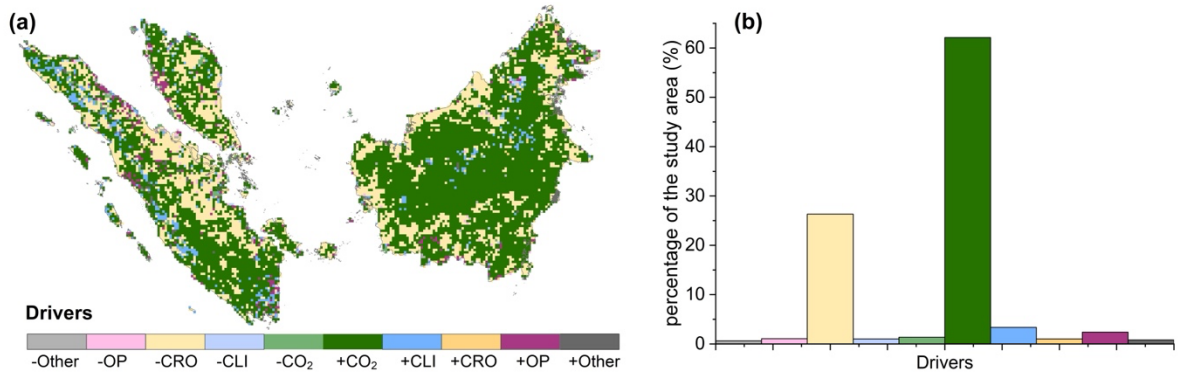

51

52

53

54

55

56

**Figure S7: Spatial pattern of dominant drivers of trend in LAI (a), and the percentage of the study area dominated by each driver (b). The drivers include elevated CO<sub>2</sub> (CO<sub>2</sub>), climate change (CLI), crop expansion (CRO), oil palm expansion (OP) and other land use changes (Other). A prefix '+' of the drivers indicates a positive impact on LAI trends, whereas '-' indicates a negative impact.**

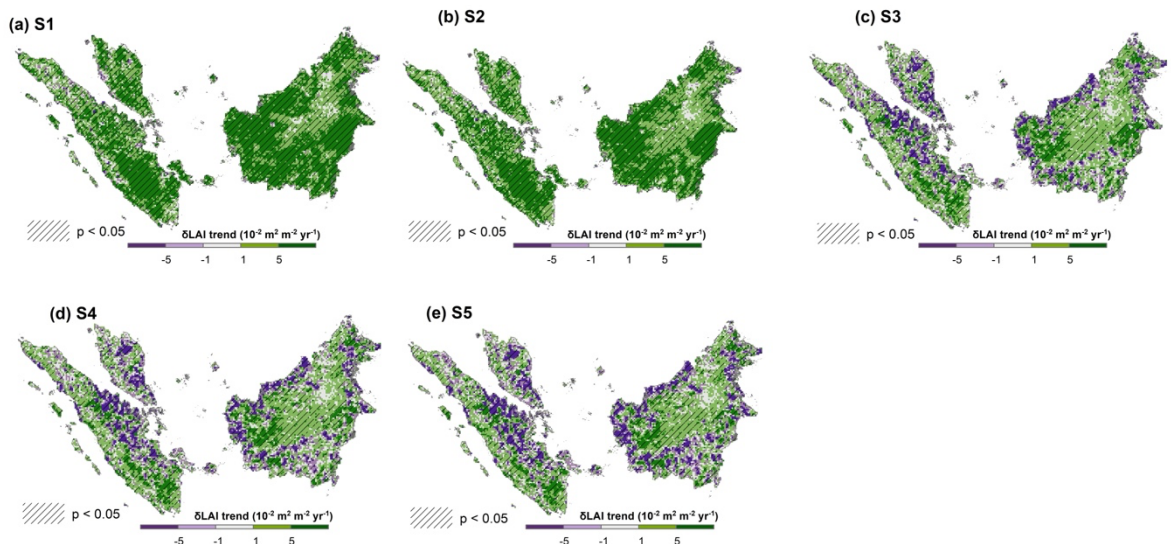

57

58

59

60

61

62

63

64

65

**Figure S8: The spatial distribution of the pixel-wise impacts of each scenario on the greening trends. For S1, only CO<sub>2</sub> concentration varied from 2001 to 2016, while climate and land use remained fixed at 2001 values. In S2, both CO<sub>2</sub> and climate changed over time, but land use stayed constant. S3 to S5 progressively incorporated different land use processes: S3 considered EBF to CRO transitions with time-varying CO<sub>2</sub>, climate, and CRO fractions, while OP and other land uses remained constant; S4 added conversions from EBF to both CRO and OP; and S5 included all LUCC changes, with CO<sub>2</sub>, climate, and all land use types varying over time.**

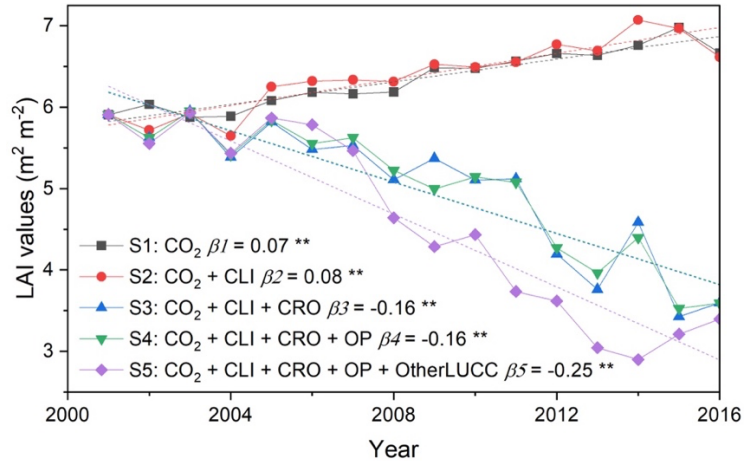

66

67 **Figure S9: A selected pixel (102.15°E, 0.95°S) to show the gradual changes in prediction results for each**

68 **scenario.**

69 **Table S1: The details of land use datasets in our study used to generate harmonized land uses in Southeast**  
 70 **Asia.**

| <b>Datasets</b>                         | <b>Time span</b> | <b>Spatial resolution</b> | <b>Sources</b>                                                                                                                                      |
|-----------------------------------------|------------------|---------------------------|-----------------------------------------------------------------------------------------------------------------------------------------------------|
| Global Forest Change maps (GFC)         | 2000-2022        | 30 m × 30 m               | Hansen et al., 2013;<br><a href="https://glad.earthengine.app/view/global-forest-change">https://glad.earthengine.app/view/global-forest-change</a> |
| Land-use harmonization datasets (LUH2)  | 0850-2019        | 0.25° × 0.25°             | Chini et al., 2021;<br><a href="https://luh.umd.edu/data.shtml">https://luh.umd.edu/data.shtml</a>                                                  |
| MODIS Land Cover Type Product (MCD12Q1) | 2001-2000        | 500 m × 500 m             | <a href="https://lpdaac.usgs.gov/products/mcd12q1v006/">https://lpdaac.usgs.gov/products/mcd12q1v006/</a>                                           |
| Annual oil palm area dataset (AOPD)     | 2001-2016        | 100 m × 100 m             | Xu et al., 2020;<br><a href="https://doi.org/10.5281/zenodo.3467071">https://doi.org/10.5281/zenodo.3467071</a>                                     |

71



72 **Table S2: The annual fractions of each land use type in our study area from 2001 to 2016 (%).**

| <b>Land Uses</b> | <b>2001</b> | <b>2002</b> | <b>2003</b> | <b>2004</b> | <b>2005</b> | <b>2006</b> | <b>2007</b> | <b>2008</b> | <b>2009</b> | <b>2010</b> | <b>2011</b> | <b>2012</b> | <b>2013</b> | <b>2014</b> | <b>2015</b> | <b>2016</b> |
|------------------|-------------|-------------|-------------|-------------|-------------|-------------|-------------|-------------|-------------|-------------|-------------|-------------|-------------|-------------|-------------|-------------|
| EBF              | 73.41       | 72.67       | 71.92       | 70.83       | 69.76       | 68.57       | 66.97       | 65.46       | 63.77       | 62.82       | 61.66       | 59.84       | 58.67       | 57.01       | 55.84       | 53.09       |
| CRO              | 14.45       | 14.69       | 14.94       | 15.57       | 15.81       | 16.37       | 16.97       | 17.57       | 18.53       | 19.13       | 19.80       | 20.82       | 21.50       | 22.53       | 23.31       | 24.56       |
| OP               | 3.91        | 4.44        | 5.06        | 5.50        | 5.96        | 6.45        | 7.31        | 8.10        | 8.65        | 9.03        | 9.37        | 9.81        | 10.31       | 10.67       | 10.85       | 12.05       |
| Pasture          | 3.20        | 3.20        | 3.04        | 3.01        | 3.24        | 3.30        | 3.38        | 3.44        | 3.51        | 3.49        | 3.55        | 3.73        | 3.68        | 3.78        | 3.84        | 3.98        |
| Grass            | 0.63        | 0.64        | 0.62        | 0.62        | 0.65        | 0.66        | 0.67        | 0.67        | 0.69        | 0.70        | 0.71        | 0.74        | 0.74        | 0.76        | 0.77        | 0.79        |
| Other Forest     | 0.08        | 0.02        | 0.02        | 0.03        | 0.04        | 0.07        | 0.04        | 0.04        | 0.04        | 0.02        | 0.02        | 0.03        | 0.03        | 0.04        | 0.04        | 0.03        |

73 Note: EBF, CROP, and OP are short for evergreen broadleaf forests, croplands, and oil palm plantations, respectively.

**Table S3: The variables used to explain LAI variations using XGBoost model.**

| Categories                     | Variables | Descriptions and Units                                      | Sources                                                                                             |
|--------------------------------|-----------|-------------------------------------------------------------|-----------------------------------------------------------------------------------------------------|
| Land use types                 | f_EBF     | Fraction of evergreen broadleaf forest in the grid cell (%) | see Methods                                                                                         |
|                                | f_OP      | Fraction of oil palm in the grid cell (%)                   |                                                                                                     |
|                                | f_CRO     | Fraction of cropland in the grid cell (%)                   |                                                                                                     |
|                                | f_Other   | Fraction of other land uses in the grid cell (%)            |                                                                                                     |
| Climate variables              | MAT       | Mean annual temperature (°C)                                | <a href="https://cds.climate.copernicus.eu/">https://cds.climate.copernicus.eu/</a>                 |
|                                | MAP       | Total annual precipitation (mm)                             |                                                                                                     |
|                                | WS        | Wind speed (m s <sup>-1</sup> )                             |                                                                                                     |
|                                | RAD       | Shortwave downward radiation (J m <sup>-2</sup> )           |                                                                                                     |
|                                | RH        | Relatively humidity (%)                                     |                                                                                                     |
| Stand Ages                     | Age_EBF   | Stand ages of evergreen broadleaf forests (year)            | <a href="https://doi.org/10.17871/ForestAgeBGI.2021">https://doi.org/10.17871/ForestAgeBGI.2021</a> |
|                                | Age_OP    | Stand ages of oil palms (year)                              | <a href="http://dare.iiasa.ac.at/85/">http://dare.iiasa.ac.at/85/</a>                               |
| CO <sub>2</sub> concentrations | CO2       | Annual CO <sub>2</sub> concentrations (ppm)                 | <a href="https://gml.noaa.gov/dv/data/">https://gml.noaa.gov/dv/data/</a>                           |

75
